# Supplementary material for: Gene Losses and Variations in Chloroplast Genome of Parasitic Plant Macrosolen and Phylogenetic Relationships within Santalales
Source: PubMed Central journal article supplement (PMC6888684; doi:10.3390/ijms20225812), 2019-11-19
Supplement: ijms-20-05812-s001.pdf [file ijms-20-05812-s001.pdf]

## Supplementary Tables

**Table S1.** Gene content and gene order of the chloroplast genomes of three *Macrosolen*

| Species                               | Regions | Positions    | species  |       |       |       | Length<br>(bp) |        |
|---------------------------------------|---------|--------------|----------|-------|-------|-------|----------------|--------|
|                                       |         |              | T(U) (%) | C (%) | A (%) | G (%) |                |        |
| <i>Macrosolen<br/>cochinchinensis</i> | Total   |              | 31.9     | 19.0  | 30.8  | 18.3  | 129,570        |        |
|                                       | IRa     |              | 29.0     | 22.0  | 28.8  | 20.3  | 25,397         |        |
|                                       | IRb     |              | 28.8     | 20.3  | 29.0  | 22.0  | 25,397         |        |
|                                       | LSC     |              | 33.4     | 18.0  | 31.8  | 16.9  | 73,052         |        |
|                                       | SSC     |              | 40.6     | 12.5  | 35.3  | 11.6  | 5,724          |        |
|                                       | CDS     |              | 31.3     | 17.3  | 31.4  | 19.9  | 64,743         |        |
|                                       |         | 1st position |          | 23.8  | 18.5  | 31.4  | 26.2           | 21,581 |
|                                       |         | 2nd position |          | 32.3  | 19.6  | 30.7  | 17.4           | 21,581 |
|                                       |         | 3rd position |          | 37.9  | 13.9  | 32.1  | 16.1           | 21,581 |
| <i>Macrosolen<br/>tricolor</i>        | Total   |              | 31.8     | 19.2  | 30.5  | 18.5  | 126,621        |        |
|                                       | IRa     |              | 29.0     | 22.1  | 28.6  | 20.3  | 24,703         |        |
|                                       | IRb     |              | 28.6     | 20.3  | 29.0  | 22.1  | 24,703         |        |
|                                       | LSC     |              | 33.3     | 18.2  | 31.5  | 17.0  | 71,895         |        |
|                                       | SSC     |              | 40.3     | 13.4  | 33.8  | 12.4  | 5,320          |        |
|                                       | CDS     |              | 31.3     | 17.4  | 31.3  | 20.0  | 64,794         |        |
|                                       |         | 1st position |          | 23.8  | 18.6  | 31.3  | 26.2           | 21,598 |
|                                       |         | 2nd position |          | 32.3  | 19.6  | 30.6  | 17.5           | 21,598 |
|                                       |         | 3rd position |          | 37.7  | 13.9  | 32.1  | 16.2           | 21,598 |
| <i>Macrosolen<br/>bibracteolatus</i>  | Total   |              | 31.7     | 19.3  | 30.5  | 18.6  | 127,169        |        |
|                                       | IRa     |              | 29.0     | 22.1  | 28.7  | 20.3  | 25,445         |        |
|                                       | IRb     |              | 28.7     | 20.3  | 29.0  | 22.1  | 25,445         |        |
|                                       | LSC     |              | 33.1     | 18.4  | 31.4  | 17.1  | 70,692         |        |
|                                       | SSC     |              | 39.8     | 13.4  | 34.0  | 12.7  | 5,587          |        |
|                                       | CDS     |              | 31.2     | 17.4  | 31.3  | 20.0  | 64,560         |        |
|                                       |         | 1st position |          | 23.8  | 18.8  | 31.3  | 26.2           | 21,520 |
|                                       |         | 2nd position |          | 32.3  | 19.6  | 30.6  | 17.5           | 21,520 |
|                                       |         | 3rd position |          | 37.6  | 13.9  | 32.1  | 16.4           | 21,520 |

1. CDS: protein-coding regions; 2. 1st position: 1st base of codons; 3. 2nd position: 2nd base of codons; 4. 3rd position: 3rd base of codons.

**Table S2.** Genes content introns of three *Macrosolen* species

| Species                   | Gene        | Location | Exon1(bp) | Intron1(bp) | Exon2(bp) | Intron2(bp) | Exon3(bp) |
|---------------------------|-------------|----------|-----------|-------------|-----------|-------------|-----------|
| <i>M. cochinchinensis</i> | <i>atpF</i> | LSC      | 150       | 750         | 405       |             |           |
|                           | <i>clpP</i> | LSC      | 71        | 838         | 292       | 617         | 228       |
|                           | <i>petB</i> | LSC      | 6         | 755         | 642       |             |           |
|                           | <i>petD</i> | LSC      | 5         | 538         | 478       |             |           |

|                    |                          |              |       |       |       |     |     |
|--------------------|--------------------------|--------------|-------|-------|-------|-----|-----|
| <i>M. tricolor</i> | <i>rpl2</i>              | LSC, IR      | 395   | 655   | 433   |     |     |
|                    | <i>rpl16</i>             | LSC          | 9     | 990   | 399   |     |     |
|                    | <i>rpoC1</i>             | LSC          | 432   | 749   | 1,614 |     |     |
|                    | <i>rps12</i>             | LSC, IR      | 114   | --    | 232   | 520 | 26  |
|                    | <i>trnA-UGC</i>          | IR           | 38    | 815   | 35    |     |     |
|                    | <i>trnI-GAU</i>          | IR           | 35    | 912   | 37    |     |     |
|                    | <i>trnK-UUU</i>          | LSC          | 37    | 2,473 | 35    |     |     |
|                    | <i>trnL-UAA</i>          | LSC          | 37    | 291   | 50    |     |     |
|                    | <i>ycf3</i>              | LSC          | 125   | 726   | 229   | 698 | 153 |
|                    | <i>atpF</i>              | LSC          | 150   | 745   | 405   |     |     |
|                    | <i>clpP</i>              | LSC          | 71    | 828   | 292   | 594 | 228 |
|                    | <i>petB</i>              | LSC          | 6     | 758   | 642   |     |     |
|                    | <i>petD</i>              | LSC          | 5     | 556   | 478   |     |     |
|                    | <i>rpl2</i>              | LSC, IR      | 395   | 656   | 433   |     |     |
|                    | <i>M. bibracteolatus</i> | <i>rpl16</i> | LSC   | 9     | 1,003 | 399 |     |
| <i>rpoC1</i>       |                          | LSC          | 432   | 721   | 1,614 |     |     |
| <i>rps12</i>       |                          | LSC, IR      | 114   | --    | 232   | 531 | 26  |
| <i>trnA-UGC</i>    |                          | IR           | 38    | 815   | 35    |     |     |
| <i>trnI-GAU</i>    |                          | IR           | 35    | 909   | 37    |     |     |
| <i>trnK-UUU</i>    |                          | LSC          | 37    | 2,497 | 35    |     |     |
| <i>trnL-UAA</i>    |                          | LSC          | 37    | 283   | 50    |     |     |
| <i>ycf3</i>        |                          | LSC          | 125   | 728   | 229   | 680 | 153 |
| <i>atpF</i>        |                          | LSC          | 150   | 744   | 405   |     |     |
| <i>clpP</i>        |                          | LSC          | 71    | 790   | 292   | 598 | 228 |
| <i>petB</i>        |                          | LSC          | 6     | 752   | 642   |     |     |
| <i>petD</i>        |                          | LSC          | 5     | 532   | 478   |     |     |
| <i>rpl2</i>        |                          | LSC, IR      | 395   | 656   | 433   |     |     |
| <i>rpl16</i>       |                          | LSC          | 9     | 990   | 399   |     |     |
| <i>rpoC1</i>       |                          | LSC          | 432   | 721   | 1,614 |     |     |
| <i>rps12</i>       | LSC, IR                  | 114          | --    | 232   | 531   | 26  |     |
| <i>trnA-UGC</i>    | IR                       | 38           | 814   | 35    |       |     |     |
| <i>trnI-GAU</i>    | IR                       | 35           | 909   | 37    |       |     |     |
| <i>trnK-UUU</i>    | LSC                      | 37           | 2,490 | 35    |       |     |     |
| <i>trnL-UAA</i>    | LSC                      | 37           | 278   | 50    |       |     |     |
| <i>ycf3</i>        | LSC                      | 125          | 758   | 229   | 689   | 153 |     |

**Table S3.** Codon usage of three *Macrosolen* species

| Amino acid | Codon | No. |     |     | RSCU |      |      | Amino acid | Codon | No. |     |     | RSCU |      |      |
|------------|-------|-----|-----|-----|------|------|------|------------|-------|-----|-----|-----|------|------|------|
|            |       | ①   | ②   | ③   | ①    | ②    | ③    |            |       | ①   | ②   | ③   | ①    | ②    | ③    |
| Phe        | TTT   | 874 | 876 | 860 | 1.35 | 1.36 | 1.34 | Tyr        | TAT   | 631 | 629 | 626 | 1.62 | 1.63 | 1.62 |
| Phe        | TTC   | 421 | 414 | 422 | 0.65 | 0.64 | 0.66 | Tyr        | TAC   | 149 | 143 | 145 | 0.38 | 0.37 | 0.38 |
| Leu        | TTA   | 697 | 700 | 686 | 1.89 | 1.89 | 1.86 | Stop       | TAA   | 33  | 33  | 32  | 1.46 | 1.46 | 1.41 |
| Leu        | TTG   | 481 | 486 | 489 | 1.30 | 1.31 | 1.32 | Stop       | TAG   | 17  | 16  | 18  | 0.75 | 0.71 | 0.79 |
| Leu        | CTT   | 466 | 458 | 459 | 1.26 | 1.24 | 1.24 | Stop       | TGA   | 18  | 19  | 18  | 0.79 | 0.84 | 0.79 |

|     |     |     |     |     |      |      |      |     |     |       |       |       |      |      |      |
|-----|-----|-----|-----|-----|------|------|------|-----|-----|-------|-------|-------|------|------|------|
| Leu | CTC | 146 | 150 | 151 | 0.40 | 0.40 | 0.41 | Trp | TGG | 368   | 372   | 370   | 1.00 | 1.00 | 1.00 |
| Leu | CTA | 279 | 282 | 282 | 0.76 | 0.76 | 0.76 | Gln | CAA | 603   | 605   | 611   | 1.51 | 1.52 | 1.52 |
| Leu | CTG | 143 | 147 | 150 | 0.39 | 0.40 | 0.41 | Gln | CAG | 198   | 189   | 192   | 0.49 | 0.48 | 0.48 |
| Ile | ATT | 894 | 889 | 887 | 1.46 | 1.46 | 1.46 | Asn | AAT | 827   | 823   | 807   | 1.54 | 1.53 | 1.53 |
| Ile | ATC | 350 | 348 | 354 | 0.57 | 0.57 | 0.58 | Asn | AAC | 246   | 250   | 249   | 0.46 | 0.47 | 0.47 |
| Ile | ATA | 592 | 593 | 577 | 0.97 | 0.97 | 0.95 | Lys | AAA | 1,005 | 1,010 | 1,006 | 1.53 | 1.54 | 1.54 |
| Met | ATG | 477 | 475 | 479 | 1.00 | 1.00 | 1.00 | Lys | AAG | 311   | 304   | 303   | 0.47 | 0.46 | 0.46 |
| Val | GTT | 411 | 411 | 407 | 1.44 | 1.43 | 1.42 | Asp | GAT | 737   | 745   | 732   | 1.62 | 1.63 | 1.64 |
| Val | GTC | 141 | 148 | 144 | 0.49 | 0.52 | 0.50 | Asp | GAC | 173   | 170   | 163   | 0.38 | 0.37 | 0.36 |
| Val | GTA | 427 | 420 | 427 | 1.49 | 1.46 | 1.49 | Glu | GAA | 824   | 820   | 823   | 1.46 | 1.46 | 1.46 |
| Val | GTG | 166 | 170 | 168 | 0.58 | 0.59 | 0.59 | Glu | GAG | 302   | 305   | 306   | 0.54 | 0.54 | 0.54 |
| Ser | TCT | 441 | 433 | 433 | 1.62 | 1.58 | 1.59 | Pro | CCT | 301   | 295   | 295   | 1.42 | 1.38 | 1.38 |
| Ser | TCC | 267 | 270 | 268 | 0.98 | 0.99 | 0.99 | Pro | CCC | 199   | 204   | 200   | 0.94 | 0.95 | 0.94 |
| Ser | TCA | 334 | 342 | 339 | 1.23 | 1.25 | 1.25 | Pro | CCA | 247   | 248   | 246   | 1.17 | 1.16 | 1.15 |
| Ser | TCG | 164 | 171 | 169 | 0.60 | 0.62 | 0.62 | Pro | CCG | 100   | 109   | 111   | 0.47 | 0.51 | 0.52 |
| Ser | AGT | 344 | 342 | 341 | 1.26 | 1.25 | 1.25 | Arg | CGT | 283   | 285   | 288   | 1.29 | 1.29 | 1.30 |
| Ser | AGC | 82  | 84  | 82  | 0.30 | 0.31 | 0.30 | Arg | CGC | 66    | 70    | 70    | 0.30 | 0.32 | 0.32 |
| Cys | TGT | 177 | 176 | 176 | 1.47 | 1.47 | 1.48 | Arg | CGA | 308   | 321   | 316   | 1.40 | 1.45 | 1.43 |
| Cys | TGC | 64  | 63  | 62  | 0.53 | 0.53 | 0.52 | Arg | CGG | 98    | 97    | 100   | 0.45 | 0.44 | 0.45 |
| Thr | ACT | 432 | 437 | 428 | 1.58 | 1.61 | 1.57 | Arg | AGA | 411   | 395   | 397   | 1.87 | 1.79 | 1.79 |
| Thr | ACC | 213 | 213 | 212 | 0.78 | 0.78 | 0.78 | Arg | AGG | 151   | 157   | 158   | 0.69 | 0.71 | 0.71 |
| Thr | ACA | 315 | 307 | 311 | 1.15 | 1.13 | 1.14 | His | CAT | 421   | 424   | 421   | 1.49 | 1.49 | 1.49 |
| Thr | ACG | 131 | 132 | 137 | 0.48 | 0.48 | 0.50 | His | CAC | 144   | 144   | 145   | 0.51 | 0.51 | 0.51 |
| Ala | GCT | 479 | 476 | 476 | 1.76 | 1.76 | 1.77 | Gly | GGT | 462   | 454   | 453   | 1.33 | 1.3  | 1.30 |
| Ala | GCC | 179 | 181 | 178 | 0.66 | 0.67 | 0.66 | Gly | GGC | 150   | 155   | 154   | 0.43 | 0.44 | 0.44 |
| Ala | GCA | 300 | 299 | 298 | 1.10 | 1.11 | 1.11 | Gly | GGA | 535   | 539   | 534   | 1.54 | 1.54 | 1.53 |
| Ala | GCG | 129 | 124 | 126 | 0.47 | 0.46 | 0.47 | Gly | GGG | 247   | 251   | 253   | 0.71 | 0.72 | 0.73 |

① *M. cochinchinensis*; ② *M. tricolor*; ③ *M. bibracteolatus*

**Table S4.** Potential RNA editing sites of three *Macrosolen* species

| Gene        | Nucleotide Position |       |       | Codon change | Amino acid change | Score |
|-------------|---------------------|-------|-------|--------------|-------------------|-------|
|             | ①                   | ②     | ③     |              |                   |       |
| <i>accD</i> | -                   | -     | -     | -            | -                 | -     |
| <i>atpA</i> | 773                 | 773   | 773   | TCA-TTA      | S-L               | 1     |
|             | 914                 | 914   | 914   | TCA-TTA      | S-L               | 1     |
|             | 1,148               | 1,148 | 1,148 | TCA-TTA      | S-L               | 1     |
| <i>atpB</i> | -                   | -     | -     | -            | -                 | -     |
| <i>atpF</i> | 92                  | 92    | 92    | CCA-CTA      | P-L               | 0.86  |
| <i>atpI</i> | 23                  | 23    | 23    | ACC-ATC      | T-I               | 1     |
|             | 629                 | 629   | 629   | TCA-TTA      | S-L               | 1     |
| <i>ccsA</i> | 137                 | 137   | 137   | ACA-ATA      | T-I               | 1     |
| <i>clpP</i> | 559                 | 559   | 559   | CAT-TAT      | H-Y               | 1     |
| <i>matK</i> | 322                 | 322   | 322   | CTT-TTT      | L-F               | 0.86  |

|              |       |       |       |         |     |      |
|--------------|-------|-------|-------|---------|-----|------|
|              | 646   | 646   | 646   | CAT-TAT | H-Y | 1    |
|              | 1,384 | 1,384 | 1,384 | CCG-TCG | P-S | 0.86 |
|              | -     | 1433  | -     | TCG-TTG | S-L | 1    |
| <i>petB</i>  | 418   | 418   | 418   | CGG-TGG | R-W | 1    |
|              | 611   | 611   | 611   | TCA-TTA | S-L | 1    |
| <i>petD</i>  | -     | -     | -     | -       | -   | -    |
| <i>petG</i>  | -     | -     | -     | -       | -   | -    |
| <i>petL</i>  | -     | -     | -     | -       | -   | -    |
| <i>psaB</i>  | -     | -     | -     | -       | -   | -    |
| <i>psaI</i>  | -     | -     | -     | -       | -   | -    |
| <i>psbB</i>  | 305   | 305   | 305   | GCA-GTA | A-V | 0.86 |
| <i>psbE</i>  | -     | -     | -     | -       | -   | -    |
| <i>psbF</i>  | -     | -     | -     | -       | -   | -    |
| <i>psbL</i>  | 2     | -     | -     | ACG-ATG | T-M | 1    |
| <i>rpl2</i>  | -     | -     | -     | -       | -   | -    |
| <i>rpl20</i> | 308   | 308   | 308   | TCA-TTA | S-L | 0.86 |
| <i>rpl23</i> | -     | -     | -     | CAT-TAT | H-Y | 1    |
| <i>rpoA</i>  | 368   | 368   | 368   | TCG-TTG | S-L | 1    |
|              | 745   | 745   | 745   | CTT-TTT | L-F | 0.86 |
| <i>rpoB</i>  | 338   | 338   | 338   | TCT-TTT | S-F | 1    |
|              | 430   | 430   | 430   | CCG-TCG | S-L | 0.86 |
|              | -     | 473   | 473   | TCA-TTA | S-L | 0.86 |
|              | 551   | 551   | 551   | TCA-TTA | S-L | 1    |
|              | 566   | 566   | 566   | TCG-TTG | S-L | 1    |
|              | 898   | 898   | 898   | CTT-TTT | L-F | 0.86 |
|              | 2,342 | -     | 2,342 | ACA-ATA | T-I | 1    |
| <i>rpoC1</i> | -     | 41    | 41    | TCG-TTG | S-L | 1    |
|              | -     | 1,762 | 1,762 | CAT-TAT | H-Y | 0.86 |
| <i>rpoC2</i> | 815   | 815   | 815   | GCC-GTC | A-V | 0.86 |
|              | 827   | -     | -     | ACA-ATA | T-I | 1    |
|              | 1,256 | 1,256 | 1,256 | GCG-GTG | A-V | 0.86 |
|              | 3,686 | 3,686 | 3,692 | TCA-TTA | S-L | 0.86 |
|              | 4,064 | 4,076 | 4,082 | TCT-TTT | S-F | 0.8  |
| <i>rps2</i>  | 248   | 248   | 248   | TCA-TTA | S-L | 1    |
| <i>rps8</i>  | 92    | 92    | 92    | ACC-ATC | T-I | 1    |
|              | 182   | 182   | 182   | TCA-TTA | S-L | 1.86 |
| <i>rps14</i> | 80    | 80    | 80    | TCA-TTA | S-L | 1    |
|              | 149   | 149   | 149   | CCA-CTA | P-L | 1    |
| <i>ycf3</i>  | -     | -     | -     | -       | -   | -    |

① *M. cochinchinensis*; ② *M. tricolor*; ③ *M. bibracteolatus*

**Table S5.** Primer sequences at the boundaries between SC and IR regions of three *Macrosolen* species

| Species                   | Regions                  | Forward/Reverse | Primer sequence (5' to 3') |                        |
|---------------------------|--------------------------|-----------------|----------------------------|------------------------|
| <i>M. cochinchinensis</i> | LSC-IRa                  | F               | TCCGCCTTTGTGTTAAGCTT       |                        |
|                           |                          | R               | CGGTCTGAATGCTACATGAAGA     |                        |
|                           | IRa-SSC                  | F               | GCGCACTCAAAGGCGTAAAA       |                        |
|                           |                          | R               | AAAACCTGCTGTCATGCCCT       |                        |
|                           | SSC-IRb                  | F               | AACCGTTGTGATGGGAAAGACA     |                        |
|                           |                          | R               | AAAGGTTCCATGCGCACTCA       |                        |
|                           | IRb-LSC                  | F               | CGGTCTGAATGCTACATGAAGA     |                        |
|                           |                          | R               | CCGTGCTAACCTTGGTATGG       |                        |
|                           | <i>M. bibracteolatus</i> | LSC-IRa         | F                          | GTAGATGCTCGGGACCAAGT   |
|                           |                          |                 | R                          | ACATAAGCCAGATGACGGAAC  |
|                           |                          | IRa-SSC         | F                          | TGATCAAGCAGAGGAGGTGG   |
|                           |                          |                 | R                          | GGAGAAACCCCATGAAAGGA   |
| SSC-IRb                   |                          | F               | ACCGTTGGGATGTGAAAGACA      |                        |
|                           |                          | R               | GCGCACTCAAAGGCGTAAAA       |                        |
| IRb-LSC                   |                          | F               | ACATAAGCCAGATGACGGAAC      |                        |
|                           |                          | R               | TGGTTCACAGCCTTAGGTATCA     |                        |
| <i>M. tricolor</i>        |                          | LSC-IRa         | F                          | CCCCTTCCGTTATAGATCGAAA |
|                           |                          |                 | R                          | CCATGAGTGATTTGGCAGATTT |
|                           |                          | IRa-SSC         | F                          | CAAGCAGAGGAGGTGGCTTT   |
|                           |                          |                 | R                          | CTGCTGTCATGCCCTTTTCTG  |
|                           | SSC-IRb                  | F               | AAACCGTTGTGATGGGAAAGACA    |                        |
|                           |                          | R               | TGCGCACTCAAAGGCGTAAA       |                        |
|                           | IRb-LSC                  | F               | ACATAAGCCAGATGACGGAAC      |                        |
|                           |                          | R               | CCGTGCTAACCTTGGTATGG       |                        |

The thermocycler conditions for the PCR:

94°C 5min;

94°C 30s, 56°C 30s, 72°C 45s, 40 cycles;

72°C 10min.
